# Supplementary material for: Cyc8p and Tup1p transcription regulators antagonistically regulate Flo11p expression and complexity of yeast colony biofilms
Source: PLOS journal article supplement (doi:10.1371/journal.pgen.1007495), 2018-07-02
Supplement: S3 (10.1371/journal.pgen.1007495.s003) [file journal.pgen.1007495.s003]

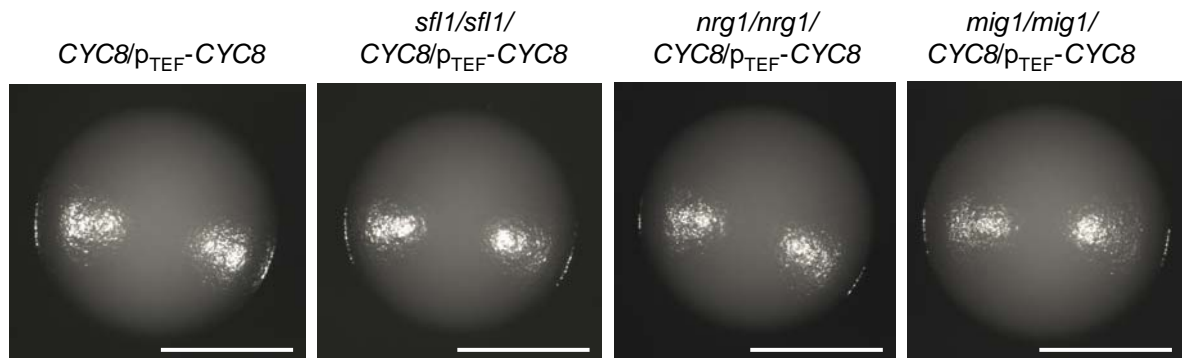

**S3 Fig: Comparison of colonies of p<sub>TEF</sub>-CYC8 strain and KO strains.** Strains with deletions of *SFL1*, *NRG1* and *MIG1* genes, respectively, were derived from p<sub>TEF</sub>-CYC8 strain. Colonies were grown 4 days on GMA. Bar, 1mm.
