# Supplementary material for: Cyc8p and Tup1p transcription regulators antagonistically regulate Flo11p expression and complexity of yeast colony biofilms
Source: PLOS journal article supplement (doi:10.1371/journal.pgen.1007495), 2018-07-02
Supplement: S4 (10.1371/journal.pgen.1007495.s004) [file journal.pgen.1007495.s004]

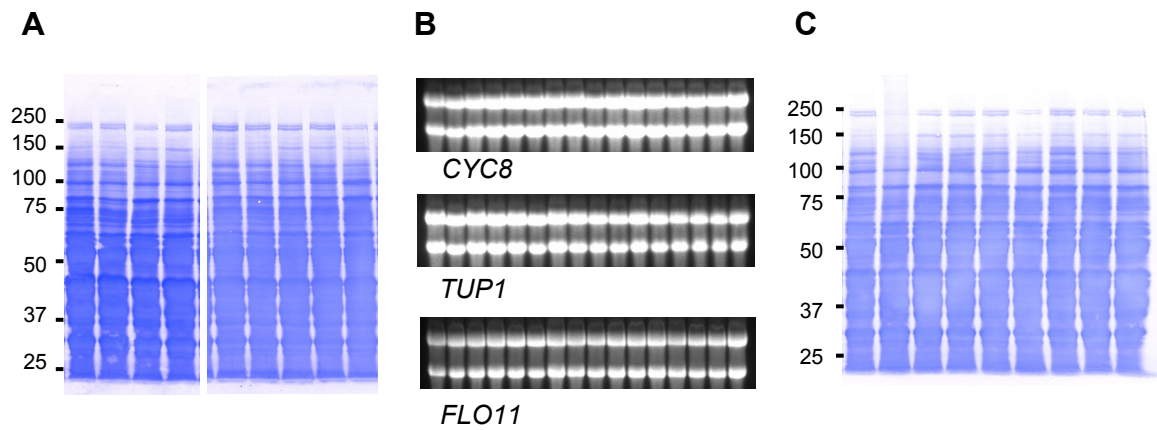

**S4 Fig: Loading controls**

Loading controls for western blots in Figure 2B (A) and Figure 3C (C) and for northern blots in Figure 3A (B).
